# Supplementary material
Source: Springer Nature journal article supplement (https://www.springermedizin.de/resource/supplementary/12911_2012_498_MOESM5_ESM.pdf/9526002)

# Average Error Per Task

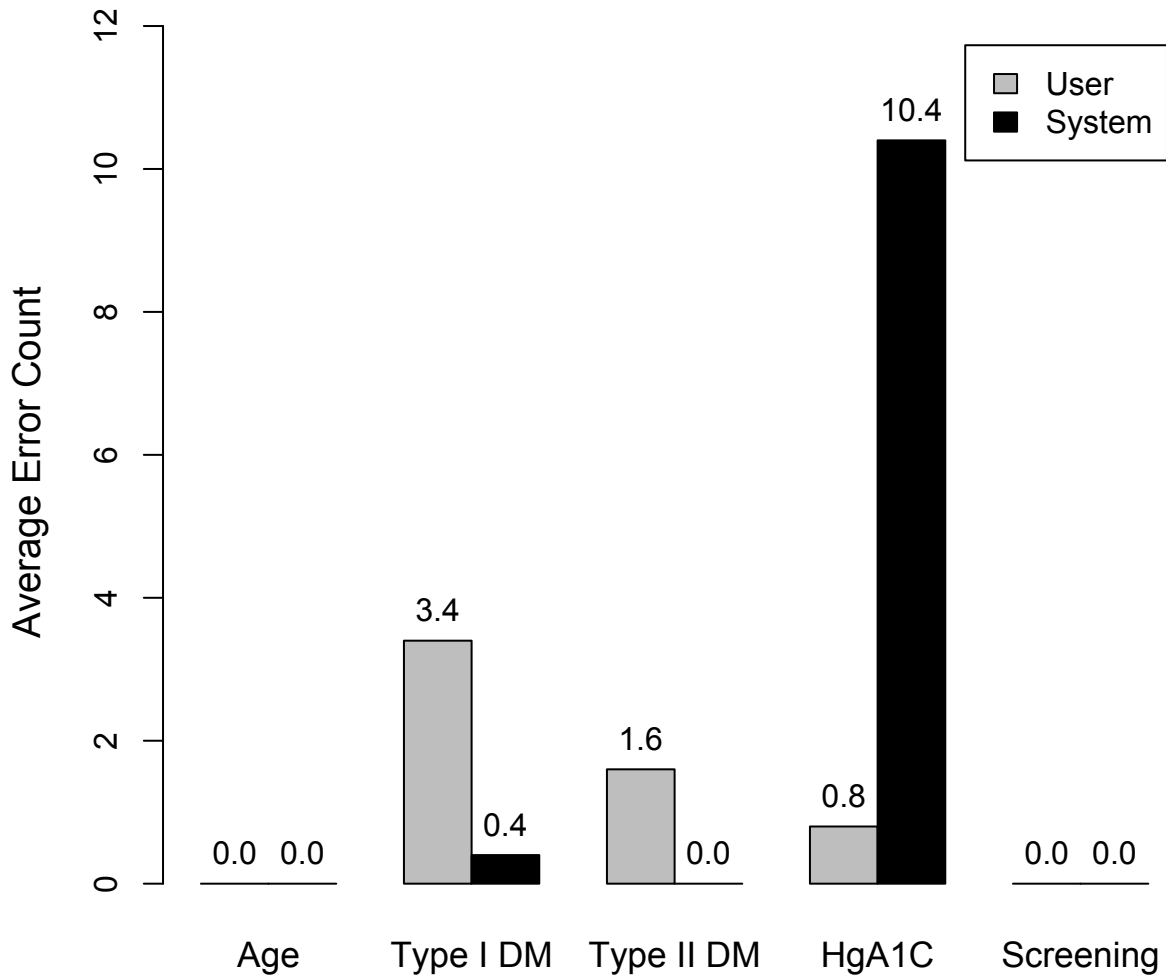

Supplement: MOESM5 [file 9526002]
